# Supplementary material
Source: PubMed Central journal article supplement (PMC2253630)
Supplement: pbio.0060037.st001.pdf [file pbio.0060037.st001.pdf]

Table S1

fasting blood glucose concentration of 6 and 8 week-old mice

| Genotype                                         | Blood Glucose (mg/dL)     |                           |
|--------------------------------------------------|---------------------------|---------------------------|
|                                                  | 6w                        | 8w                        |
| Wild-type (n=10)                                 | 84(± 1.3)                 | 87(± 2.2)                 |
| Gsk-3β <sup>+/-</sup> (n=9)                      | 81(± 2.9)                 | 75(± 1.9)                 |
| Irs2 <sup>-/-</sup> (n=15)                       | 127(± 1.9) <sup>***</sup> | 148(± 1.9) <sup>***</sup> |
| Gsk-3β <sup>+/-</sup> Irs2 <sup>-/-</sup> (n=12) | 125(± 1.3) <sup>***</sup> | 123(± 1.5) <sup>***</sup> |

<sup>\*\*\*</sup> p < 0.001 by one-factor student t-test compared with Wild-type.
