# Supplementary material
Source: PubMed Central journal article supplement (PMC2253630)

A.

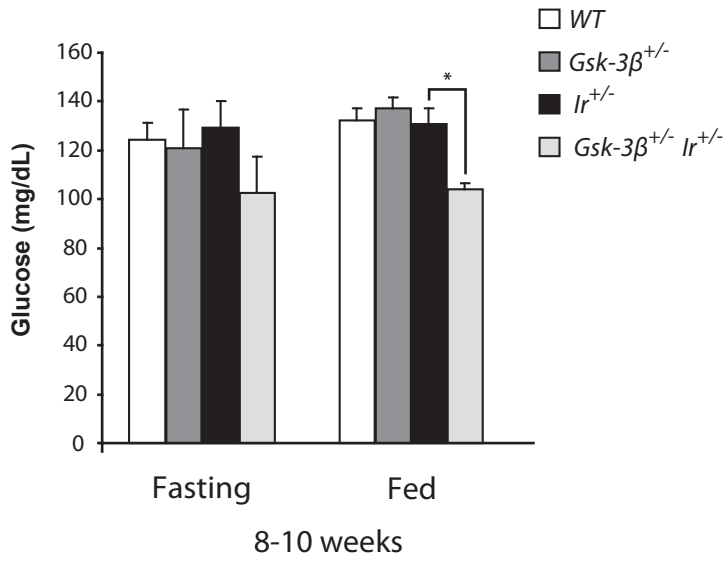

B.

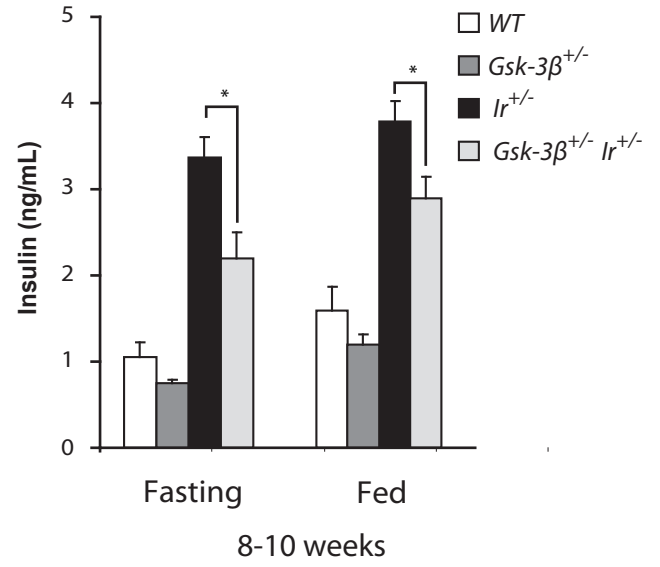

C.

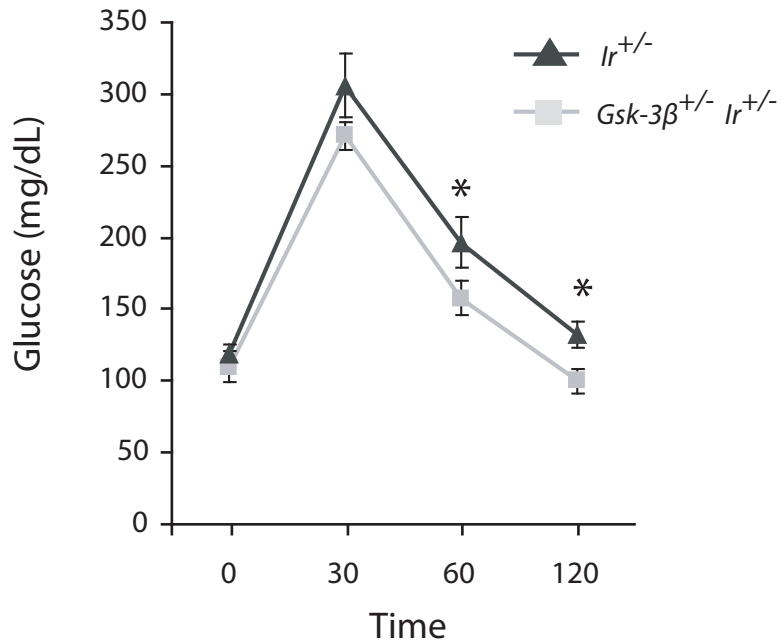

Supplement: pbio.0060037.sg001.pdf [file pbio.0060037.sg001.pdf]

A.

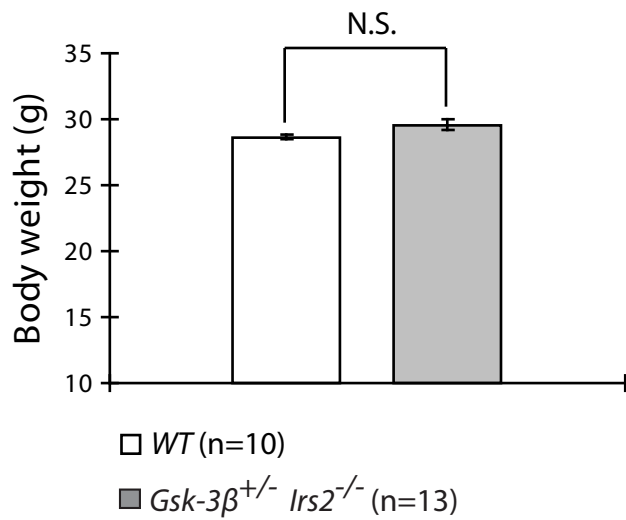

B.

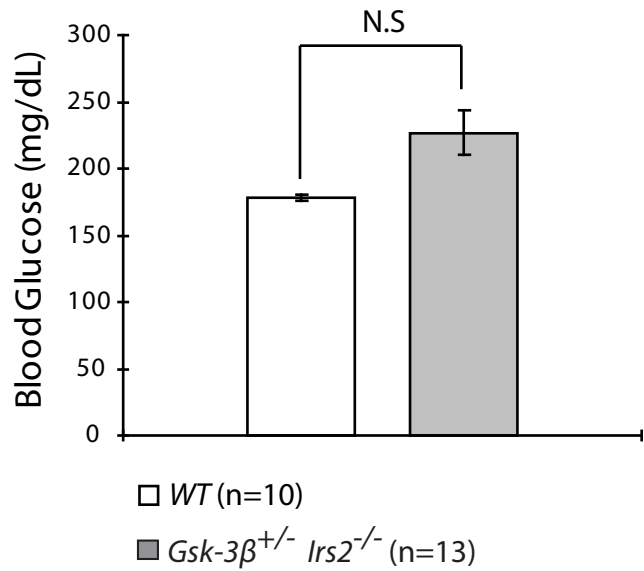

C.

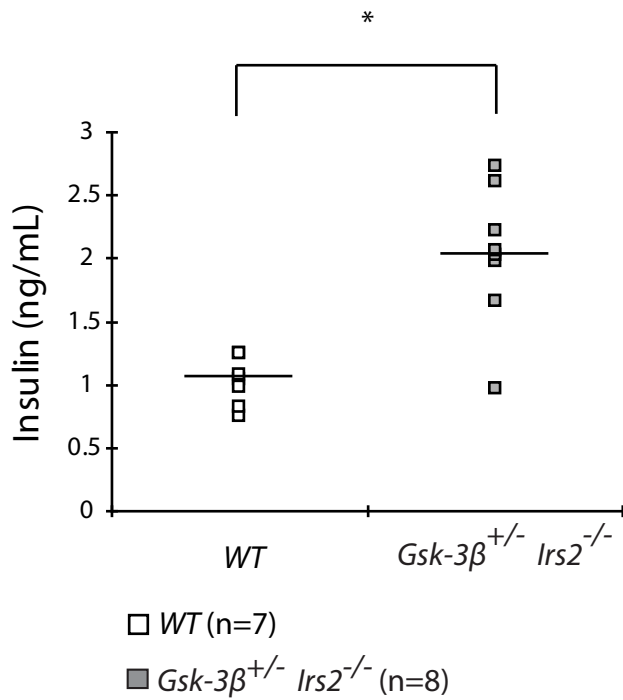

Supplement: pbio.0060037.sg002.pdf [file pbio.0060037.sg002.pdf]

*Gsk-3β*<sup>+/-</sup>

*Irs2*<sup>-/-</sup>

*Gsk-3β*<sup>+/-</sup> *Irs2*<sup>-/-</sup>

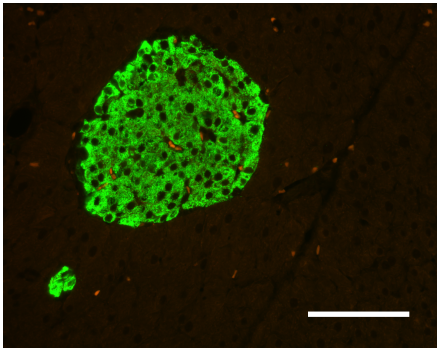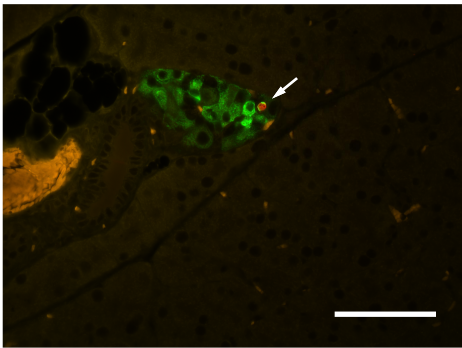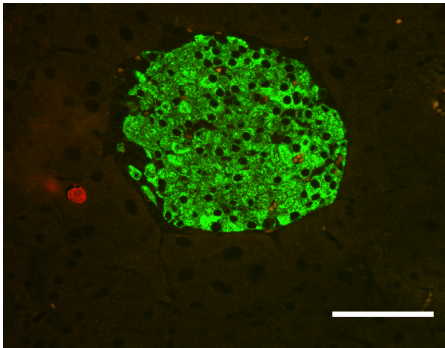

TUNEL, Insulin

Supplement: pbio.0060037.sg003.pdf [file pbio.0060037.sg003.pdf]
